# Supplementary figures and images for: Morphological and Genomic Differences in the Italian Populations of Onopordum tauricum Willd.—A New Source of Vegetable Rennet
Source: MDPI journal article supplement (doi:10.3390/plants13050654), 2024-02-27

**A**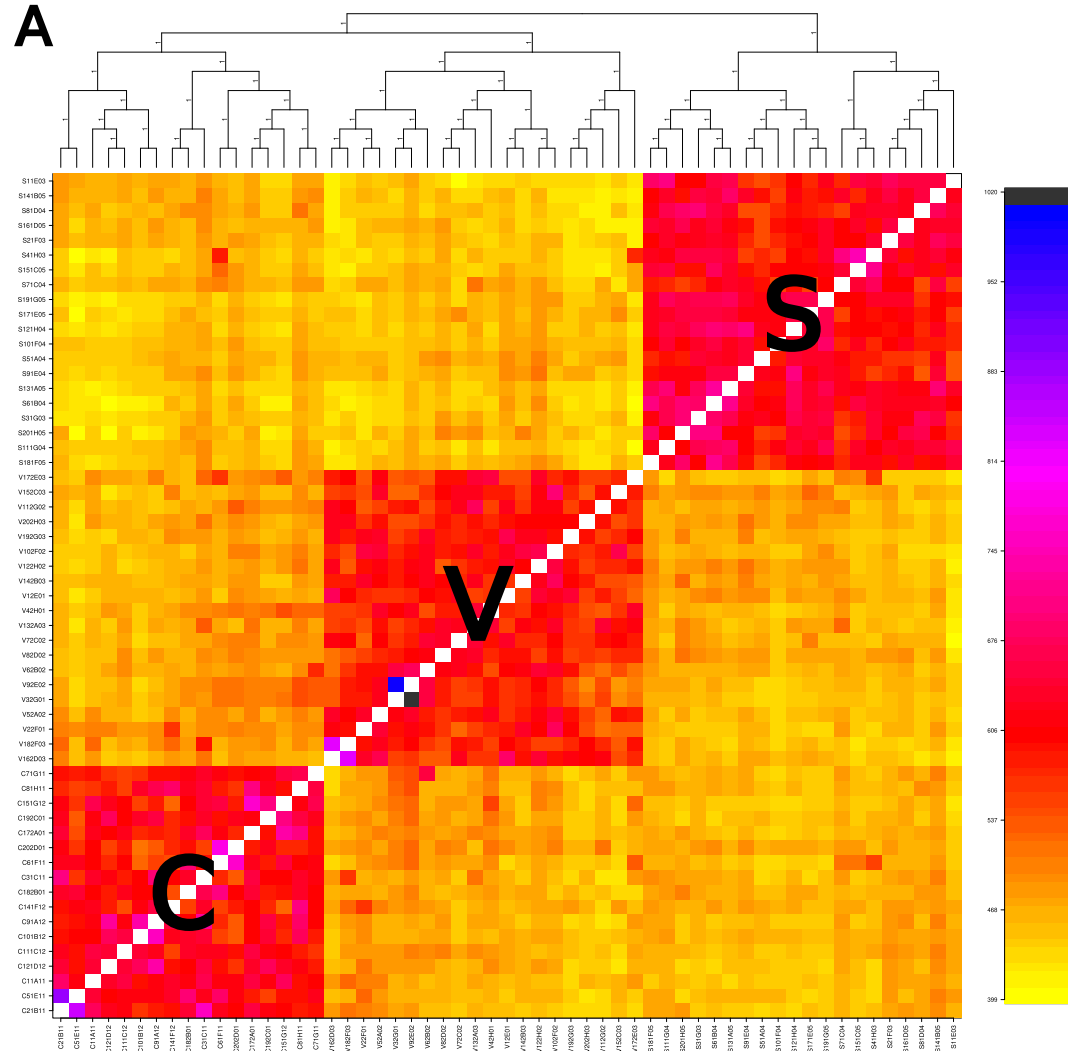**B**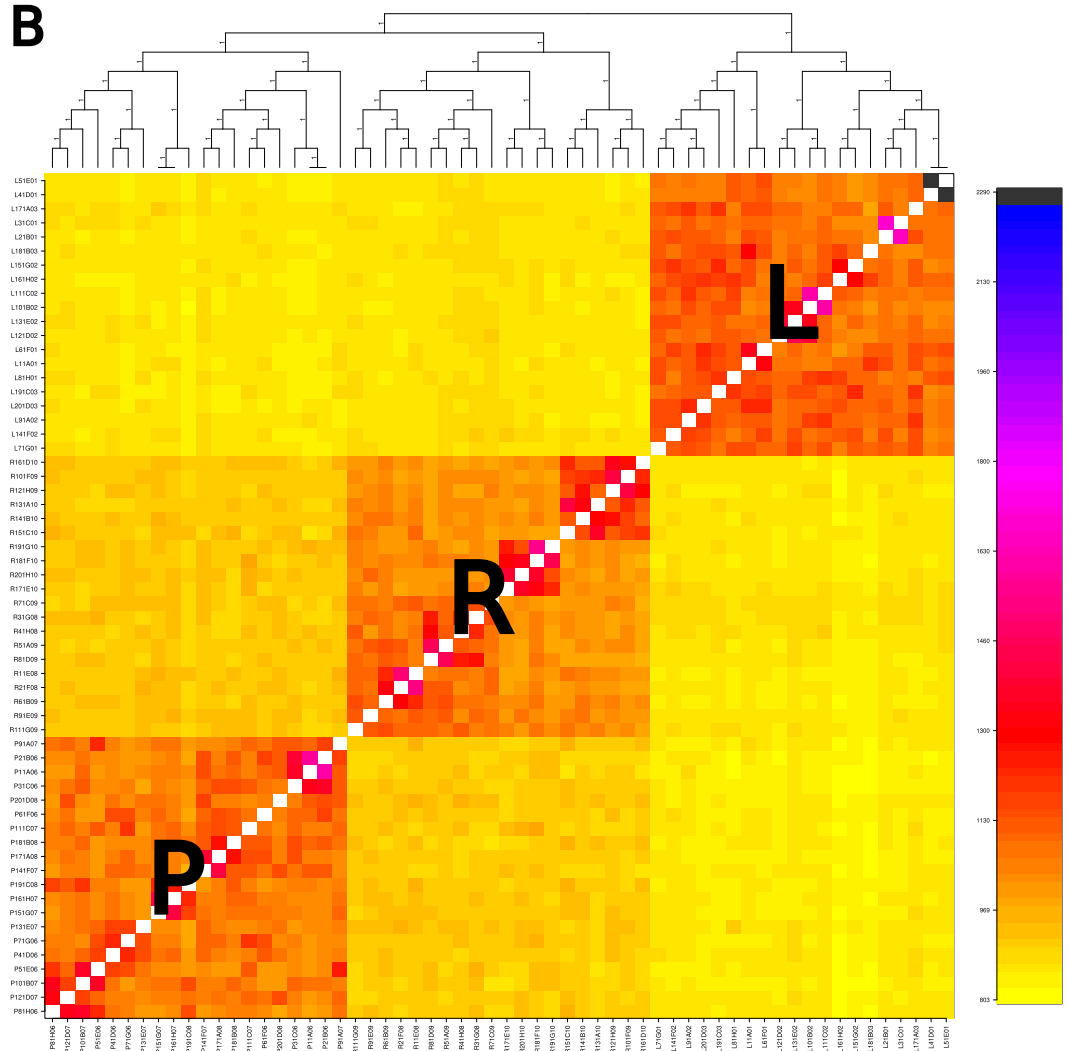

Supplement: s1 [file s1]
